# Supplementary material for: Unique and efficient adsorbents for highly selective and reverse adsorption and separation of dyes via the introduction of SO3H functional groups into a metal–organic framework
Source: PubMed Central journal article supplement (PMC9050141; doi:10.1039/c9ra10840h), 2020-03-04
Supplement: RA-010-C9RA10840H-s001.pdf [file RA-010-C9RA10840H-s001.pdf]

## Supporting information

### Materials and instrumentation

All reagents were purchased from Sigma-Aldrich and Merck chemical companies and used without further purification. FT-IR spectra were recorded on a Bruker Tensor 27 FT-IR spectrophotometer using KBr pellets over the range of 4000–400 cm<sup>-1</sup>. The X-ray powder diffraction (XRD) data were recorded on a Siefert XRD 3003 PTS diffractometer, using Cu K<sub>α1</sub> radiation ( $k = 1.5406 \text{ \AA}$ ). UV-Vis spectra were obtained with a Shimadzu UV-260 spectrophotometer. Scanning electron microscopy (SEM) images were obtained on a Philips XL-30ESEM equipped with an X-ray energy dispersive detector. Thermogravimetric analysis (TGA) was performed using a Mettler Toledo TGA/DSC instrument with heating rate of 10 °C/min in an air atmosphere. Nitrogen sorption isotherms were recorded on a Belsorp Mini-II instrument at 77K. The amount of sulfur was determined using an ELTRA carbon-sulfur analyzer.

### Adsorption kinetics

The pseudo-first-order is based on the following equation:

$$\log(q_e - q_t) = \log q_e - \frac{k_1}{2.303}t \quad (1)$$

Where  $q_e$  and  $q_t$  (mg/g) are the amounts of dye adsorbed at equilibrium and contact time ( $t$ ), respectively and  $K_1$  (min<sup>-1</sup>) represents the rate constant of pseudo-first-order kinetics.

The pseudo-second-order model is generally represented as follows:

$$\frac{t}{q_t} = \frac{1}{k_2 q_e^2} + \frac{1}{q_e}t \quad (2)$$

Where  $K_2$  (g.mg<sup>-1</sup> min<sup>-1</sup>) denotes the adsorption constant of pseudo-second-order kinetics.

## Adsorption isotherms

The Langmuir isotherm is expressed by the following equation:

$$\frac{c_e}{Q_e} = \frac{1}{Q_{max}} + \frac{1}{k_L Q_{max}} \quad (3)$$

Where  $C_e$  is the equilibrium concentration of the dye in the solution ( $\text{mg}\cdot\text{g}^{-1}$ ),  $Q_e$  represents the amount of the adsorbed dye at equilibrium ( $\text{mg}/\text{g}$ ),  $Q_{max}$  denotes the maximum adsorption capacity ( $\text{mg}/\text{g}$ ), and  $K_L$  is the Langmuir constant ( $\text{L}/\text{g}$ ) which is related to the adsorption binding energy. The Freundlich model is represented as:

$$\ln Q_e - \ln k_F = \frac{1}{n} \ln C_e \quad (4)$$

Where  $K_F$  and  $n$  are Freundlich adsorption constants which are attributed to the heterogeneous surface of the adsorbent and the desirability of the adsorption, respectively. If  $n$  is greater than 1, the adsorption is favorable and in the case of  $n < 1$ , the adsorption is unfavorable.

## Adsorption thermodynamics

The values of thermodynamic parameters including the changes in enthalpy ( $\Delta H^\circ$ ;  $\text{kJ}/\text{mol}$ ), entropy ( $\Delta S^\circ$ ;  $\text{kJ}/\text{mol}$ ), and Gibbs free energy ( $\Delta G^\circ$ ;  $\text{kJ}/\text{mol}$ ) were computed by the following equations:

$$\ln K_0 = \frac{\Delta S^\circ}{R} - \frac{\Delta H^\circ}{RT} \quad (5)$$

$$-RT \ln K_0 = \Delta H^\circ - T \Delta S^\circ \quad (6)$$

$$\Delta G^\circ = \Delta H^\circ - T \Delta S^\circ \quad (7)$$

Where  $K_0$  is the thermodynamic equilibrium constant,  $T$  is the solution temperature (K), and  $R$  is the universal gas constant ( $8.314 \text{ J}/\text{mol}\cdot\text{K}$ ) and the plots of  $\ln K_0$  vs.  $1/T$  are shown in Fig. S14.

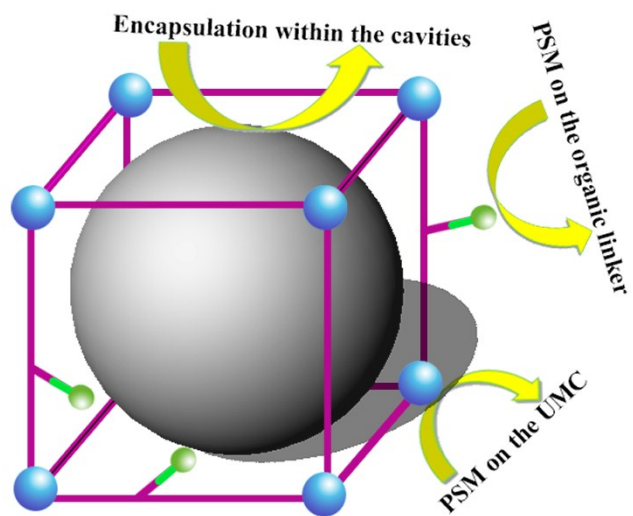

**Scheme S1.** Various situation for post synthetic modification of MOFs.

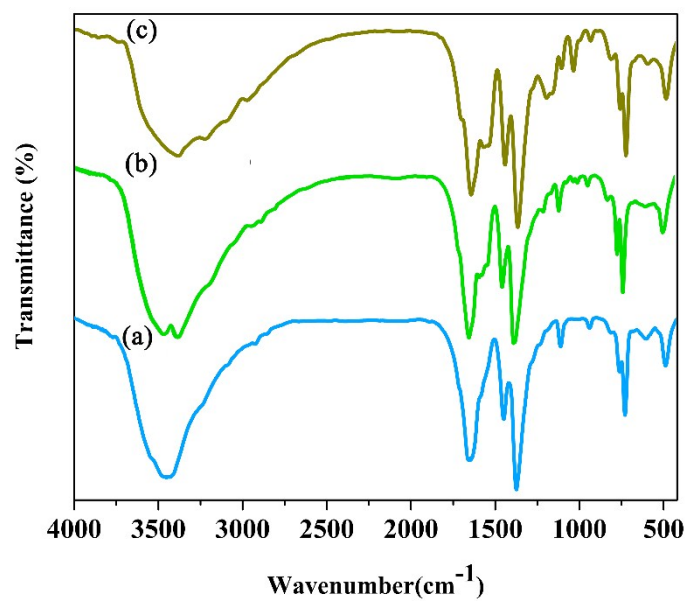

**Fig. S1.** FT-IR spectra of (a) HKUST (b) HKUST-AMP (c) HKUST-AMP-SO<sub>3</sub>H.

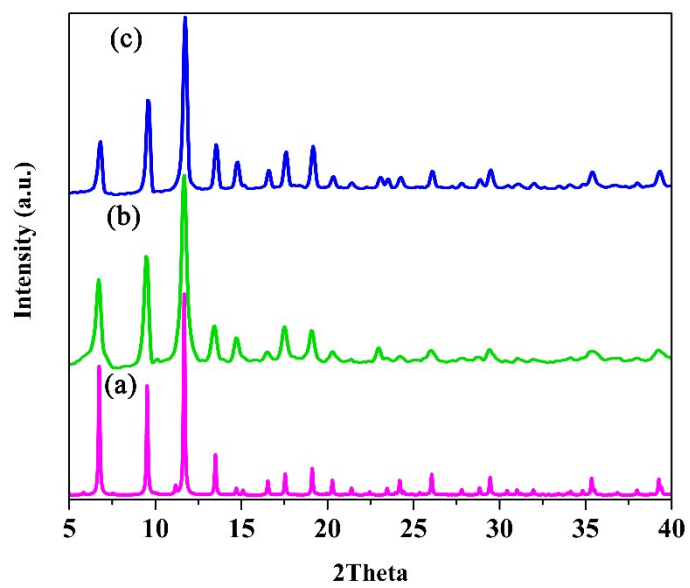

**Fig. S2.** XRD patterns of HKUST (a) simulated (b) as-synthesized, and (c) HKUST-AMP-SO<sub>3</sub>H.

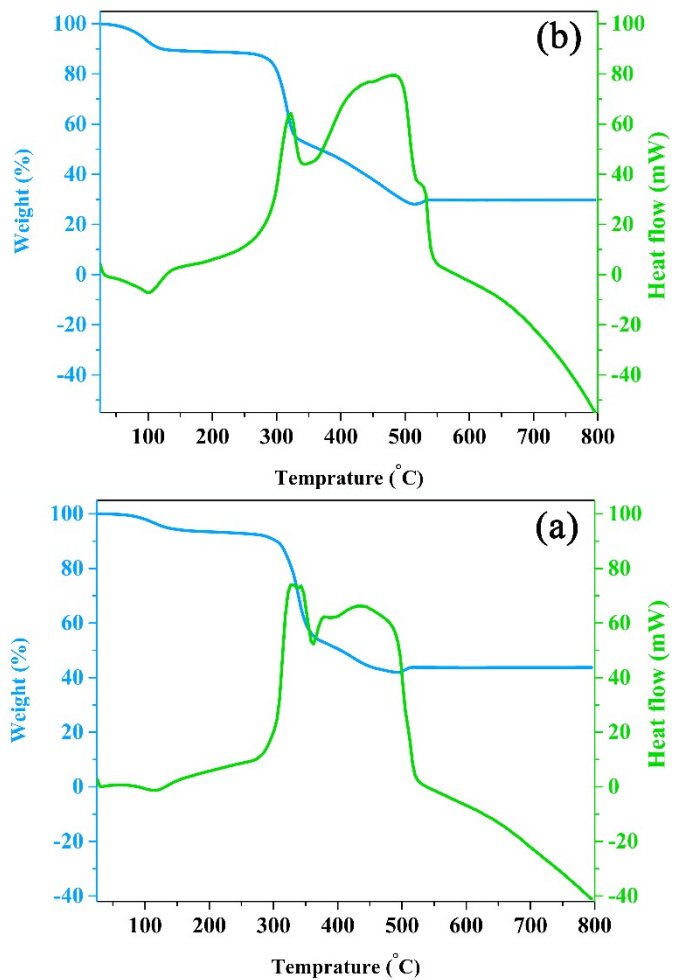

Fig. S3. TGA-DSC curves of (a) HKUST (b) HKUST-AMP-SO<sub>3</sub>H.

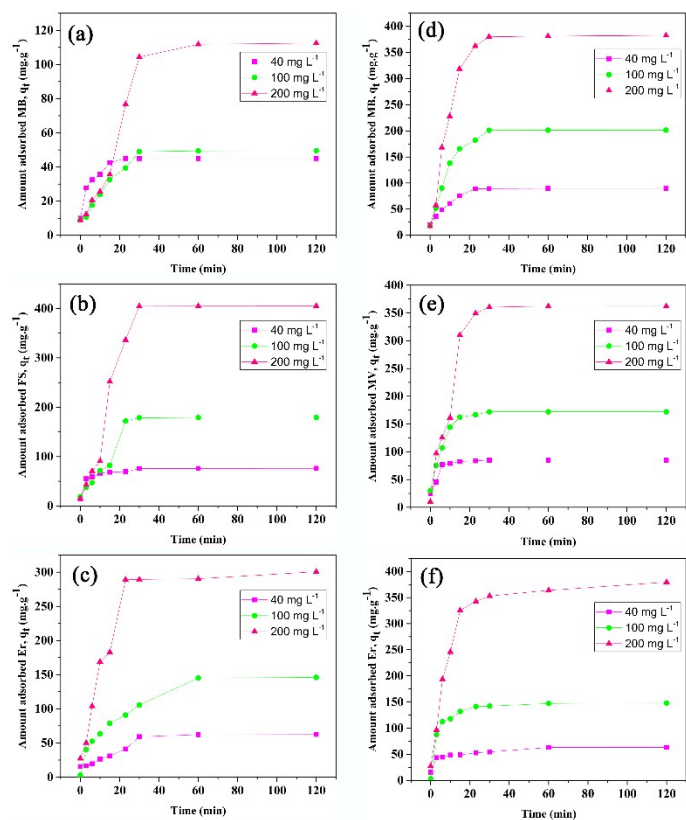

**Fig. S4.** Adsorption Capacity over HKUST for a) MB, b) FS, and c) Er. Adsorption capacity over HKUST-AMP-SO<sub>3</sub>H for d) MB, e) MV, and f) Er.

**Table S1.** The dye removal percentage of dyes using HKUST and HKUST-AMP-SO<sub>3</sub>H in different concentration of dye molecules.

| C <sub>0</sub> (mg L <sup>-1</sup> ) | Dye removal (%) |    |    |                             |    |    |
|--------------------------------------|-----------------|----|----|-----------------------------|----|----|
|                                      | HKUST           |    |    | HKUST-AMP-SO <sub>3</sub> H |    |    |
|                                      | MB              | FS | Er | MB                          | MV | Er |
| 20                                   | 64              | 81 | 46 | 97                          | 85 | 72 |
| 40                                   | 60              | 80 | 42 | 95                          | 84 | 71 |
| 60                                   | 55              | 79 | 39 | 90                          | 83 | 70 |
| 80                                   | 51              | 76 | 36 | 87                          | 82 | 68 |
| 100                                  | 49              | 75 | 31 | 86                          | 80 | 65 |
| 200                                  | 45              | 73 | 20 | 86                          | 78 | 60 |

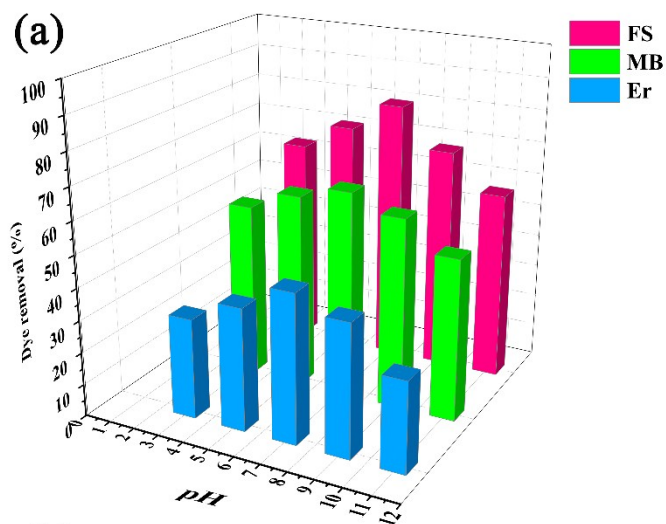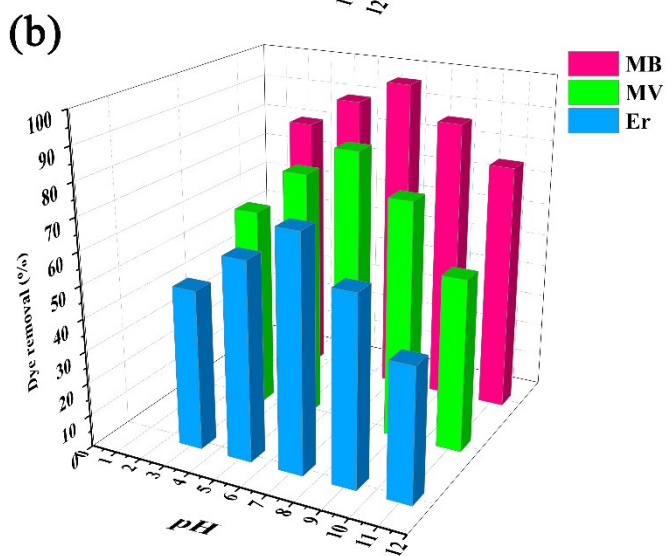

Fig. S5. Effect of pH on dye removal using (a) HKUST (b) HKUST-AMP-SO<sub>3</sub>H.

Table S2. The effect of temperature on dye adsorption of MB, FS, Er, and MV over HKUST and HKUST-AMP-SO<sub>3</sub>H.

| Temperature (K) | Dye removal (%) |    |    |                             |    |    |
|-----------------|-----------------|----|----|-----------------------------|----|----|
|                 | HKUST           |    |    | HKUST-AMP-SO <sub>3</sub> H |    |    |
|                 | MB              | FS | Er | MB                          | MV | Er |
| 298             | 64              | 81 | 46 | 97                          | 85 | 72 |
| 308             | 50              | 61 | 32 | 72                          | 69 | 61 |
| 323             | 23              | 45 | 17 | 54                          | 48 | 43 |

**Table S3.** The effect of adsorbent dosage on dye adsorption of MB, FS, Er, and MV.

| Dose (mg) | Dye removal (%) |    |    |                             |    |    |
|-----------|-----------------|----|----|-----------------------------|----|----|
|           | HKUST           |    |    | HKUST-AMP-SO <sub>3</sub> H |    |    |
|           | MB              | FS | Er | MB                          | MV | Er |
| 3         | 19              | 43 | 20 | 41                          | 61 | 39 |
| 5         | 39              | 66 | 32 | 68                          | 76 | 45 |
| 10        | 64              | 81 | 46 | 97                          | 85 | 72 |
| 15        | 64              | 82 | 48 | 97                          | 88 | 74 |
| 20        | 65              | 84 | 49 | 99                          | 89 | 77 |

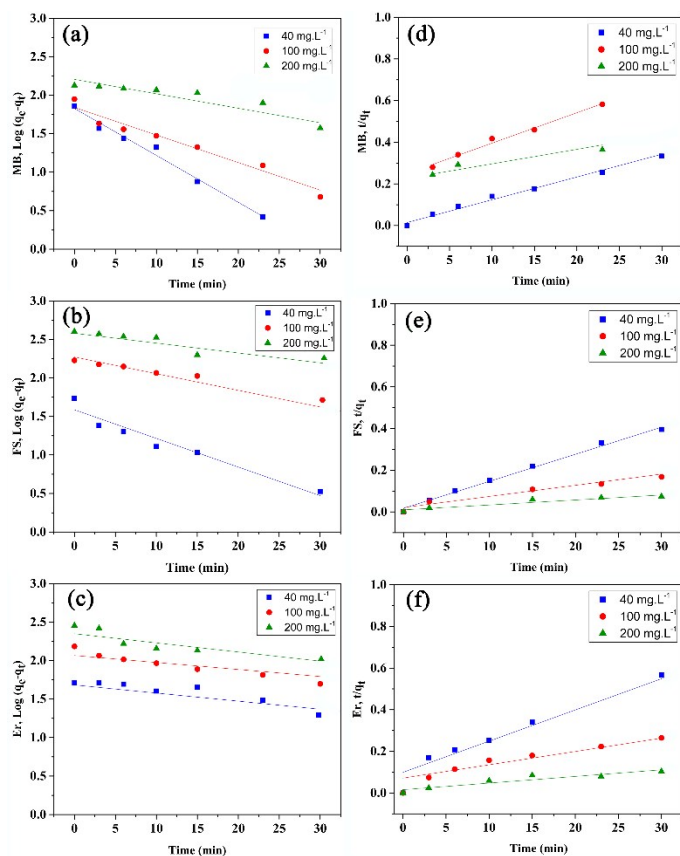

**Fig. S6.** Plots of pseudo-first-order kinetics over HKUST for a) MB, b) FS, and c) Er. Plots of pseudo-second-order kinetics over HKUST-AMP-SO<sub>3</sub>H for d) MB, e) FS, and f) Er.



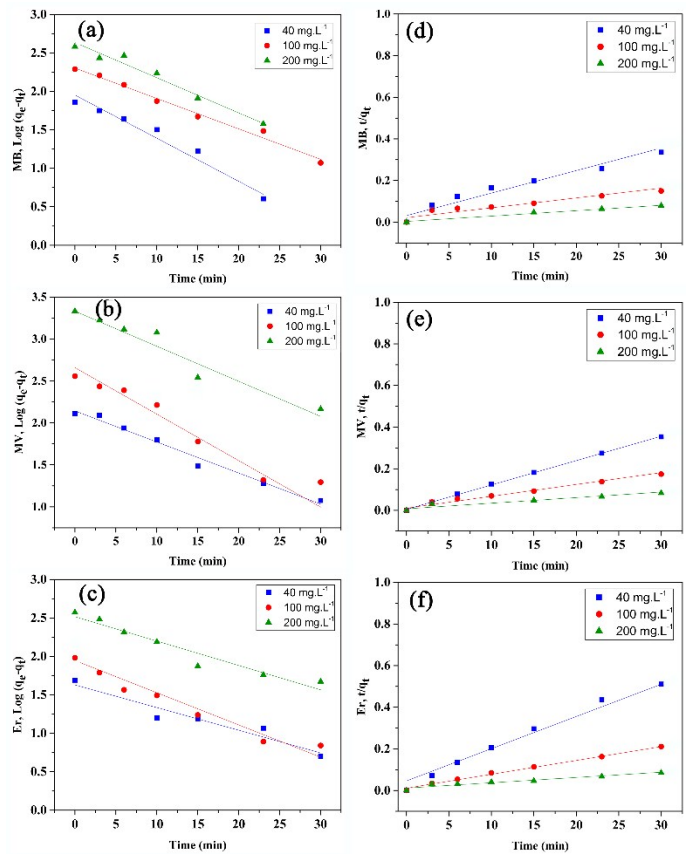

**Fig. S7.** Plots of pseudo-first-order kinetics over HKUST-AMP-SO<sub>3</sub>H for a) MB, b) MV, and c) Er. Plots of pseudo-second-order kinetics over HKUST-AMP-SO<sub>3</sub>H for d) MB, e) MV, and f) Er.

**Table S4.** Adsorption kinetics parameters of MB, FS, and Er using HKUST as adsorbent.

| Dye | C <sub>0</sub> (mg L <sup>-1</sup> ) | pseudo-first-order                  |                                      |                | pseudo-second-order                                    |                                      |                |
|-----|--------------------------------------|-------------------------------------|--------------------------------------|----------------|--------------------------------------------------------|--------------------------------------|----------------|
|     |                                      | K <sub>1</sub> (min <sup>-1</sup> ) | q <sub>e</sub> (mg g <sup>-1</sup> ) | R <sub>2</sub> | K <sub>2</sub> (g mg <sup>-1</sup> min <sup>-1</sup> ) | q <sub>e</sub> (mg g <sup>-1</sup> ) | R <sub>2</sub> |
| MB  | 40                                   | 0.140                               | 67.28                                | 0.9849         | 0.021                                                  | 91.74                                | 0.9994         |
|     | 100                                  | 0.070                               | 54.18                                | 0.9357         | 0.011                                                  | 53.76                                | 0.9893         |
|     | 200                                  | 0.012                               | 128.20                               | 0.973          | 0.001                                                  | 142.85                               | 0.9975         |
| FS  | 40                                   | 0.085                               | 38.69                                | 0.9219         | 2.1×10 <sup>-3</sup>                                   | 59.17                                | 0.9996         |
|     | 100                                  | 0.027                               | 125.89                               | 0.849          | 1×10 <sup>-3</sup>                                     | 188.67                               | 0.9911         |
|     | 200                                  | 0.029                               | 380.18                               | 0.9791         | 0.6×10 <sup>-3</sup>                                   | 416.66                               | 0.9930         |
| Er  | 40                                   | 0.024                               | 47.86                                | 0.8626         | 0.002                                                  | 66.66                                | 0.9885         |
|     | 100                                  | 0.020                               | 114.81                               | 0.9704         | 0.5×10 <sup>-3</sup>                                   | 156.25                               | 0.9816         |
|     | 200                                  | 0.027                               | 218.77                               | 0.9233         | 0.6×10 <sup>-3</sup>                                   | 312.5                                | 0.990          |

**Table S5.** Adsorption kinetics parameters of MB, MV, and Er using HKUST-AMP-SO<sub>3</sub>H as adsorbent.

| Dye | C <sub>0</sub> (mg L <sup>-1</sup> ) | pseudo-first-order                  |                                      |                | pseudo-second-order                                    |                                      |                |
|-----|--------------------------------------|-------------------------------------|--------------------------------------|----------------|--------------------------------------------------------|--------------------------------------|----------------|
|     |                                      | K <sub>1</sub> (min <sup>-1</sup> ) | q <sub>e</sub> (mg g <sup>-1</sup> ) | R <sub>2</sub> | K <sub>2</sub> (g mg <sup>-1</sup> min <sup>-1</sup> ) | q <sub>e</sub> (mg g <sup>-1</sup> ) | R <sub>2</sub> |
| MB  | 40                                   | 0.129                               | 89.61                                | 0.9566         | 3 ×10 <sup>-3</sup>                                    | 92.59                                | 0.9973         |
|     | 100                                  | 0.091                               | 201.37                               | 0.9874         | 1×10 <sup>-3</sup>                                     | 212.76                               | 0.9942         |
|     | 200                                  | 0.105                               | 425.99                               | 0.988          | 0.1×10 <sup>-3</sup>                                   | 400                                  | 0.9993         |
| MV  | 40                                   | 0.002                               | 129.12                               | 0.9434         | 2×10 <sup>-3</sup>                                     | 204.08                               | 0.9999         |
|     | 100                                  | 0.003                               | 153.12                               | 0.9451         | 3×10 <sup>-3</sup>                                     | 175.43                               | 0.9987         |
|     | 200                                  | 0.1275                              | 398.10                               | 0.969          | 0.3×10 <sup>-3</sup>                                   | 370.37                               | 0.9956         |
| Er  | 40                                   | 0.025                               | 24.54                                | 0.9261         | 0.005                                                  | 64.51                                | 0.9976         |
|     | 100                                  | 0.096                               | 25.02                                | 0.9235         | 0.006                                                  | 149.25                               | 0.9996         |
|     | 200                                  | 0.073                               | 323.59                               | 0.938          | 0.5×10 <sup>-3</sup>                                   | 400                                  | 0.9956         |

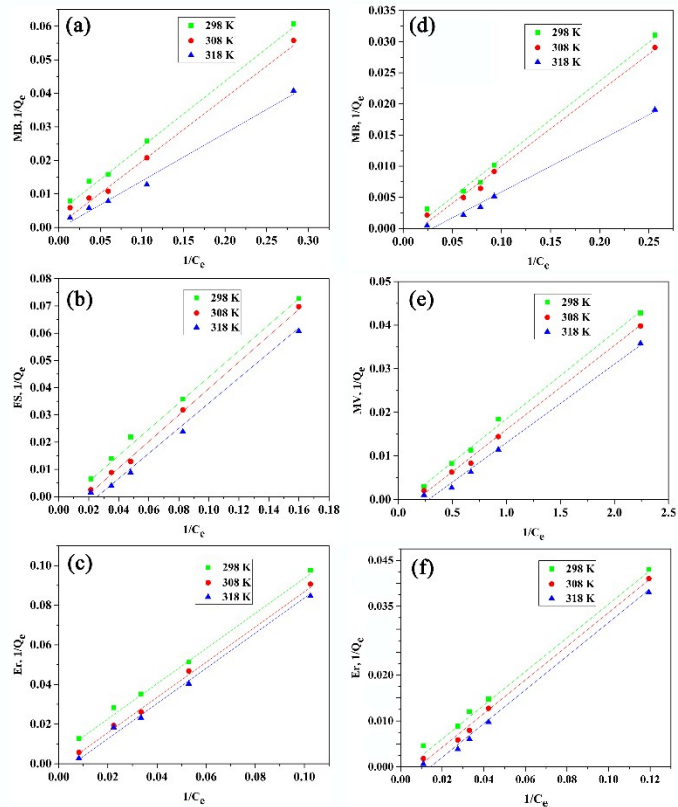

**Fig. S8.** Langmuir isotherm of adsorption over HKUST for a) MB, b) FS, and c) Er. Langmuir isotherm of adsorption over HKUST-AMP-SO<sub>3</sub>H for d) MB, e) MV, and f) Er at 298, 308,318<sup>0</sup>K.

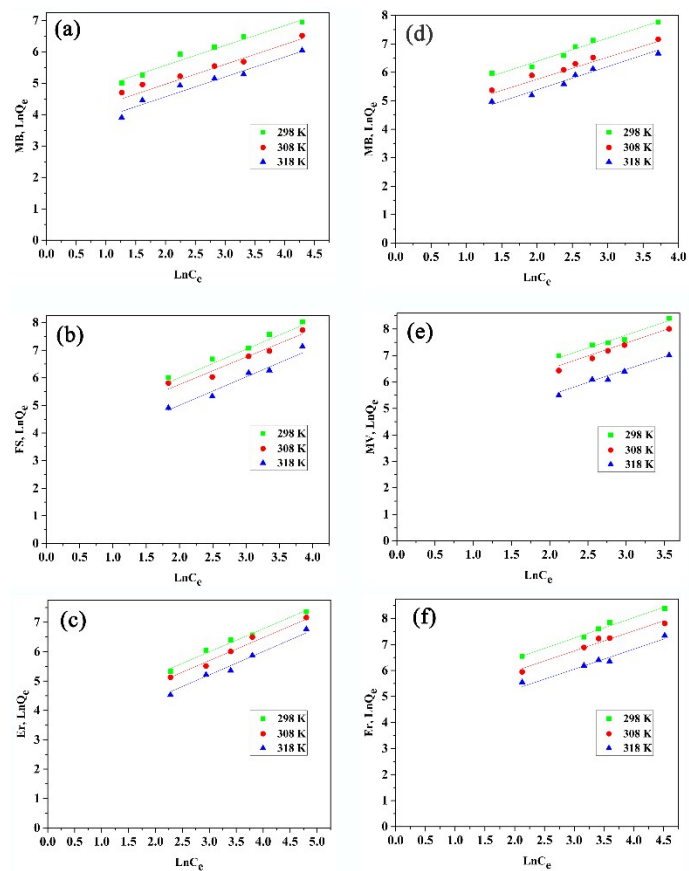

**Fig. S9.** Freundlich isotherm of adsorption over HKUST for a) MB, b) FS, and c) Er. Freundlich isotherm of adsorption over HKUST-AMP-SO<sub>3</sub>H for d) MB, e) MV, and f) Er at 298, 308, 318 °K.

**Table S6.** Isotherm parameters of MB, FS, and Er over HKUST.

| Dye | T(K) | Langmuir |                             |       |       | Freundlich |       |       |
|-----|------|----------|-----------------------------|-------|-------|------------|-------|-------|
|     |      | Q(mg/g)  | $K_L$ (L mg <sup>-1</sup> ) | $R_L$ | $R_2$ | $n_F$      | $K_F$ | $R_2$ |
| MB  | 298  | 238.09   | 0.0214                      | 0.423 | 0.980 | 1.620      | 81.10 | 0.921 |
|     | 308  | 224.65   | 0.0192                      | 0.389 | 0.991 | 1.425      | 80.34 | 0.932 |
|     | 318  | 204.21   | 0.0142                      | 0.354 | 0.987 | 1.372      | 78.12 | 0.968 |
| FS  | 298  | 243.90   | 0.0082                      | 0.627 | 0.998 | 0.991      | 54.99 | 0.962 |
|     | 308  | 234.02   | 0.0072                      | 0.605 | 0.994 | 0.990      | 52.76 | 0.942 |
|     | 318  | 210.54   | 0.0055                      | 0.586 | 0.991 | 0.859      | 50.12 | 0.957 |
| Er  | 298  | 200      | 0.0056                      | 0.709 | 0.991 | 1.282      | 57.64 | 0.983 |
|     | 308  | 183.21   | 0.0045                      | 0.692 | 0.984 | 1.204      | 54.98 | 0.964 |
|     | 318  | 176.09   | 0.0023                      | 0.675 | 0.995 | 1.145      | 52.56 | 0.978 |

**Table S7.** Isotherm parameters of MB, MV, and Er over HKUST-AMP-SO<sub>3</sub>H.

| Dye | T(K) | Langmuir |                             |       |       | Freundlich |        |       |
|-----|------|----------|-----------------------------|-------|-------|------------|--------|-------|
|     |      | Q(mg/g)  | $K_L$ (L mg <sup>-1</sup> ) | $R_L$ | $R_2$ | $n_F$      | $K_F$  | $R_2$ |
| MB  | 298  | 833.33   | 0.0096                      | 0.598 | 0.993 | 1.240      | 119.02 | 0.974 |
|     | 308  | 810.98   | 0.0084                      | 0.431 | 0.986 | 1.178      | 110.56 | 0.962 |
|     | 318  | 797.45   | 0.0071                      | 0.367 | 0.991 | 1.023      | 105.98 | 0.979 |
| MV  | 298  | 714.28   | 0.0706                      | 0.201 | 0.997 | 1.049      | 135.74 | 0.959 |
|     | 308  | 706.23   | 0.0695                      | 0.187 | 0.988 | 1.023      | 123.68 | 0.969 |
|     | 318  | 695.87   | 0.0618                      | 0.145 | 0.992 | 1.001      | 109.06 | 0.973 |
| Er  | 298  | 833.33   | 0.0033                      | 0.801 | 0.994 | 1.275      | 133.79 | 0.967 |
|     | 308  | 813.98   | 0.0029                      | 0.765 | 0.991 | 1.165      | 126.25 | 0.952 |
|     | 318  | 798.23   | 0.0021                      | 0.632 | 0.989 | 1.078      | 117.04 | 0.975 |

**Table S8.** Thermodynamic parameters of MB, FS, and Er adsorption over HKUST.

| Dye | T(K) | LnK <sub>0</sub> | $\Delta G^\circ$ (kJ mol <sup>-1</sup> ) | $\Delta H^\circ$ (kJ mol <sup>-1</sup> ) | $\Delta S^\circ$ (J mol <sup>-1</sup> K <sup>-1</sup> ) |
|-----|------|------------------|------------------------------------------|------------------------------------------|---------------------------------------------------------|
| MB  | 298  | 1.43             | -3.30                                    | -5.08                                    | -5.09                                                   |
|     | 308  | 1.40             | -2.91                                    |                                          |                                                         |
|     | 318  | 1.30             | -2.73                                    |                                          |                                                         |
| FS  | 298  | 1.04             | -2.52                                    | -13.35                                   | -36.04                                                  |
|     | 308  | 0.91             | -2.14                                    |                                          |                                                         |
|     | 318  | 0.70             | -1.74                                    |                                          |                                                         |
| Er  | 298  | 0.65             | -1.45                                    | -12.98                                   | -38.10                                                  |
|     | 308  | 0.5              | -1.19                                    |                                          |                                                         |
|     | 318  | 0.32             | -0.81                                    |                                          |                                                         |

**Table S9.** Thermodynamic parameters of MB, MV, and Er adsorption over HKUST-AMP-SO<sub>3</sub>H.

| Dye | T(K) | LnK <sub>0</sub> | $\Delta G^\circ$ (kJ mol <sup>-1</sup> ) | $\Delta H^\circ$ (kJ mol <sup>-1</sup> ) | $\Delta S^\circ$ (J mol <sup>-1</sup> K <sup>-1</sup> ) |
|-----|------|------------------|------------------------------------------|------------------------------------------|---------------------------------------------------------|
| MB  | 298  | 2.22             | -5.40                                    | -22.56                                   | -57.58                                                  |
|     | 308  | 1.87             | -4.73                                    |                                          |                                                         |
|     | 318  | 1.80             | -4.14                                    |                                          |                                                         |
| MV  | 298  | 6.12             | -4.29                                    | -10.61                                   | -15.35                                                  |
|     | 308  | 6.01             | -4.13                                    |                                          |                                                         |
|     | 318  | 5.85             | -3.96                                    |                                          |                                                         |
| Er  | 298  | 1.01             | -2.42                                    | -10.23                                   | -25.89                                                  |
|     | 308  | 0.89             | -2.21                                    |                                          |                                                         |
|     | 318  | 0.75             | -1.89                                    |                                          |                                                         |

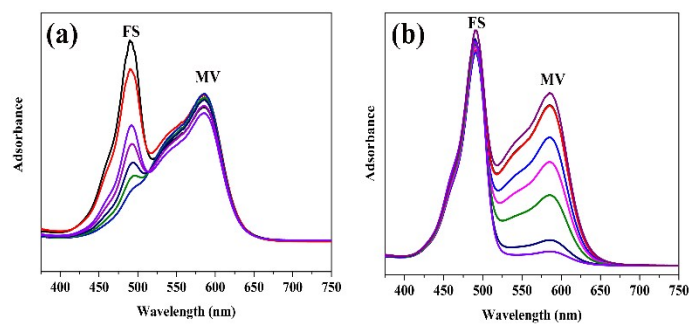

**Fig. S10.** The reverse performance of (a) HKUST and (b) HKUST-AMP-SO<sub>3</sub>H for FS-MV mixture.

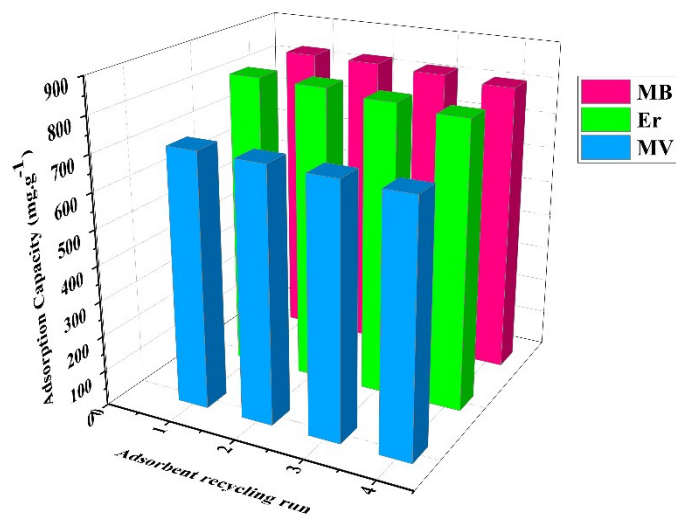

**Fig. S11.** The effect of recycling run on adsorption of MB, Er, and MV over HKUST-AMP-SO<sub>3</sub>H.

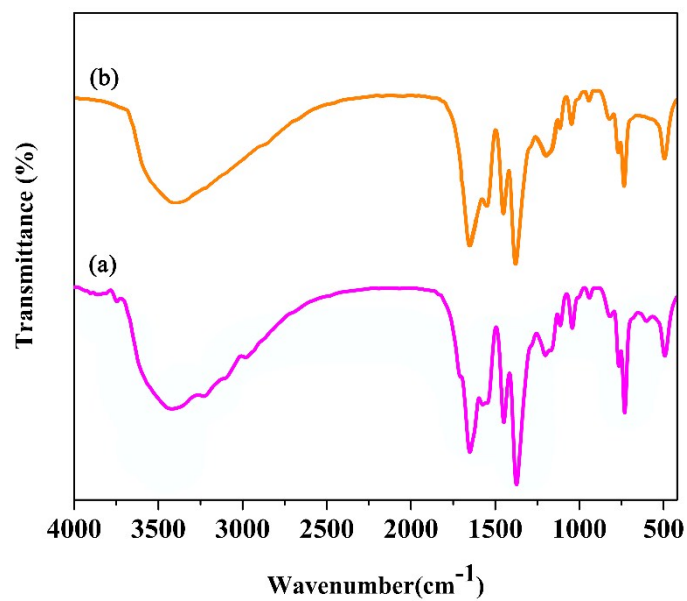

Fig. S12. FT-IR spectra of HKUST-AMP-SO<sub>3</sub>H (a) before and (b) after using as an adsorbent.

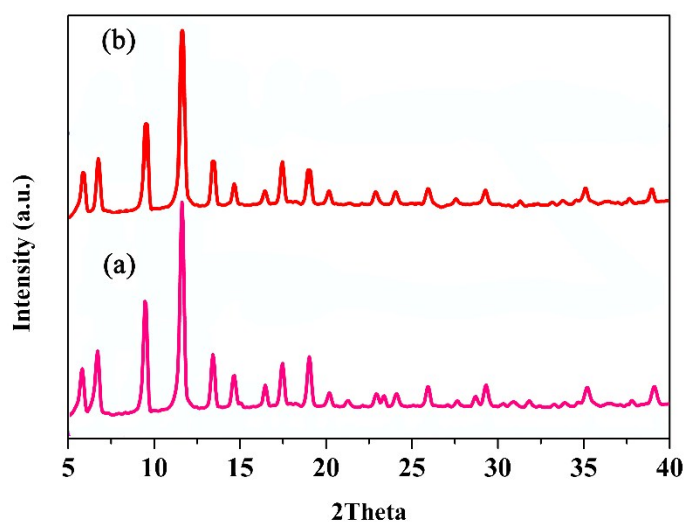

Fig. S13. XRD patterns of HKUST-AMP-SO<sub>3</sub>H (a) before and (b) after using as an adsorbent.



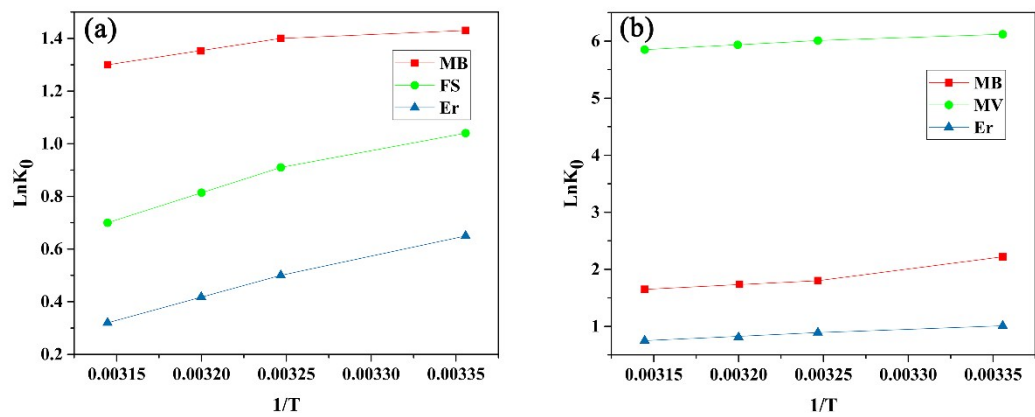

Fig. S14. Van't Hoff plots of used dye molecule over a) HKUST b) HKUST-AMP-SO<sub>3</sub>H.
